# Supplementary material
Source: PubMed Central journal article supplement (PMC10054137)
Supplement: NIHMS1875666-supplement-Supplementary_Data.pdf [file NIHMS1875666-supplement-Supplementary_Data.pdf]

## Structure of cytoplasmic ring of nuclear pore complex by integrative cryo-EM and AlphaFold

Pietro Fontana Ying Dong Xiong Pi Alexander B. Tong Corey W. Hecksel Longfei Wang Tian-Min Fu Carlos Bustamante Hao Wu

*Science*, 376 (6598), eabm9326. • DOI: 10.1126/science.abm9326

### View the article online

<https://www.science.org/doi/10.1126/science.abm9326>

### Permissions

<https://www.science.org/help/reprints-and-permissions>

Use of this article is subject to the [Terms of service](#)

---

*Science* (ISSN ) is published by the American Association for the Advancement of Science. 1200 New York Avenue NW, Washington, DC 20005. The title *Science* is a registered trademark of AAAS.

Copyright © 2022 The Authors, some rights reserved; exclusive licensee American Association for the Advancement of Science. No claim to original U.S. Government Works

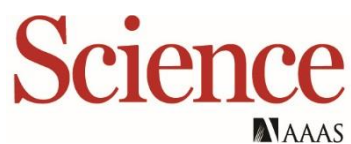

## Supplementary Materials for

### **Structure of cytoplasmic ring of nuclear pore complex by integrative cryo-EM and AlphaFold**

Pietro Fontana *et al.*

Corresponding author: Hao Wu, [wu@crystal.harvard.edu](mailto:wu@crystal.harvard.edu)

*Science* **376**, eabm9326 (2022)

DOI: [10.1126/science.abm9326](https://doi.org/10.1126/science.abm9326)

#### **The PDF file includes:**

Figs. S1 to S8  
Tables S1 to S6

#### **Other Supplementary Material for this manuscript includes the following:**

MDAR Reproducibility Checklist

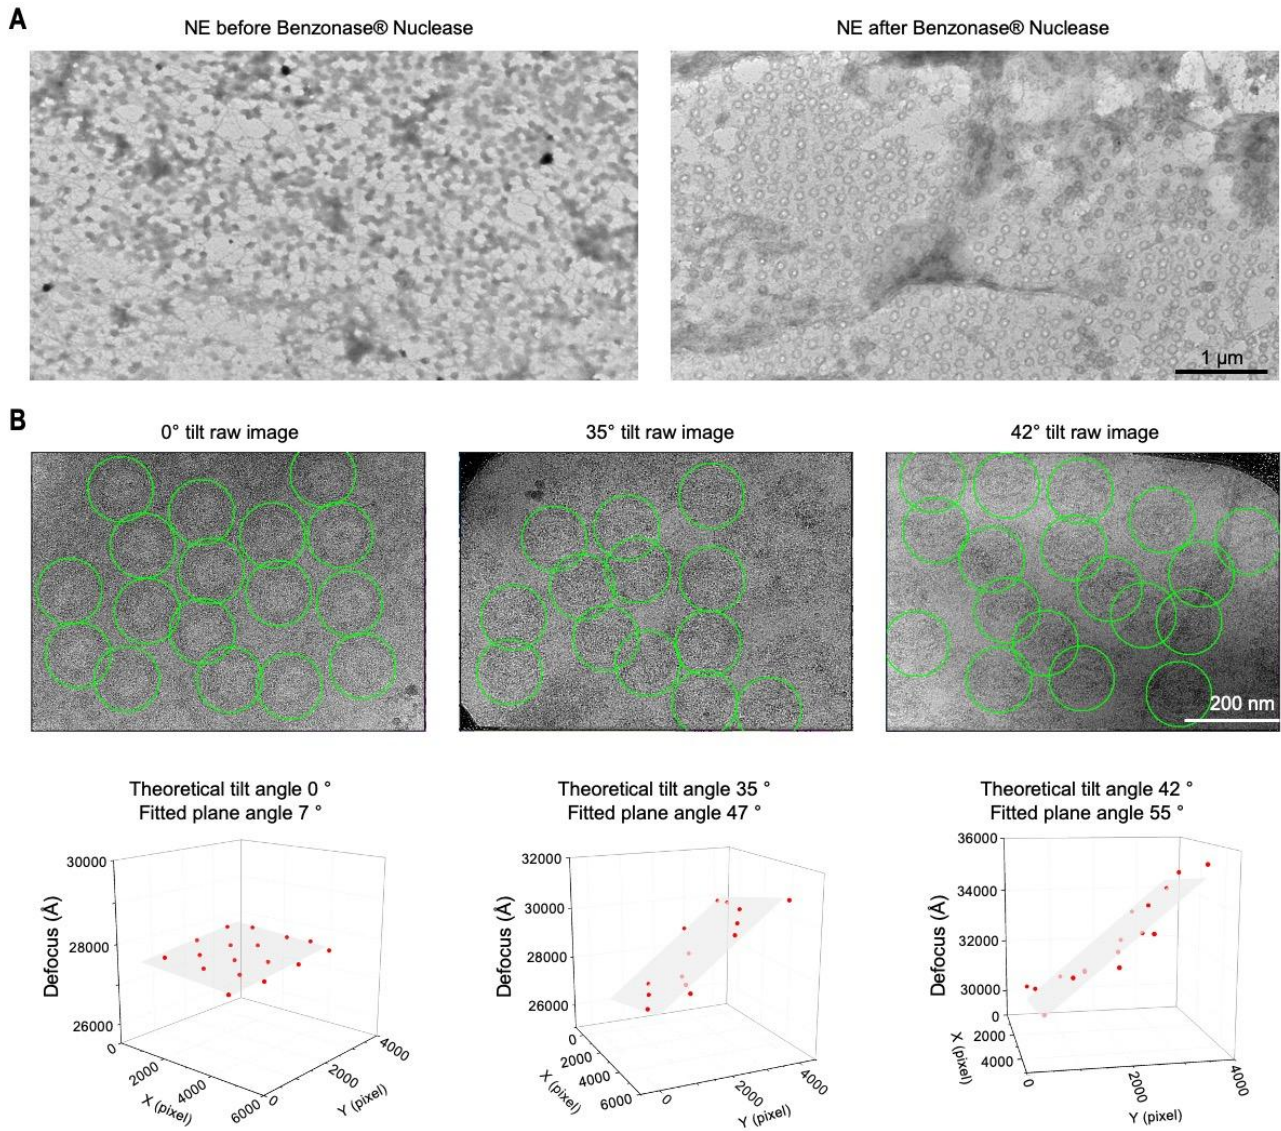

**Fig. S1. Sample preparation and cryo-EM data quality.** (A) A representative negative staining EM image of the nuclear envelope (NE) before (left) and after (right) treatment with Benzonase® Nuclease. (B) Raw cryo-EM images (top) and 3D plots composed of the X and Y positions and the defocus levels ( $\Delta Z$ ) of the particles in tilt images (bottom). Planes that fit the data points are shown.

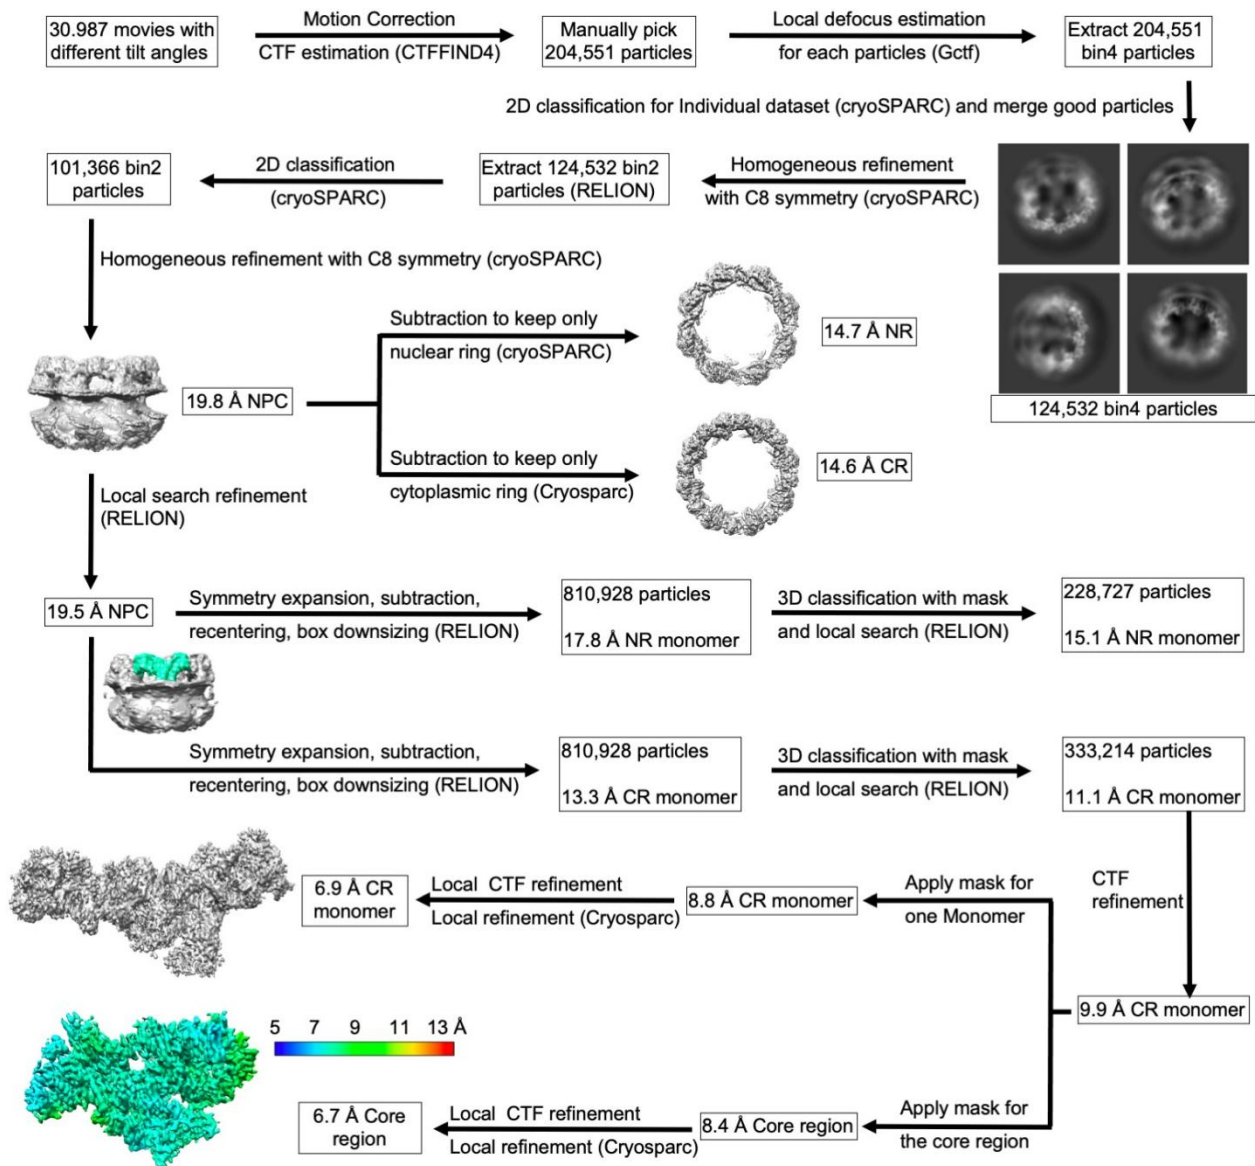

**Fig. S2. Cryo-EM data processing flow chart and local resolution.**

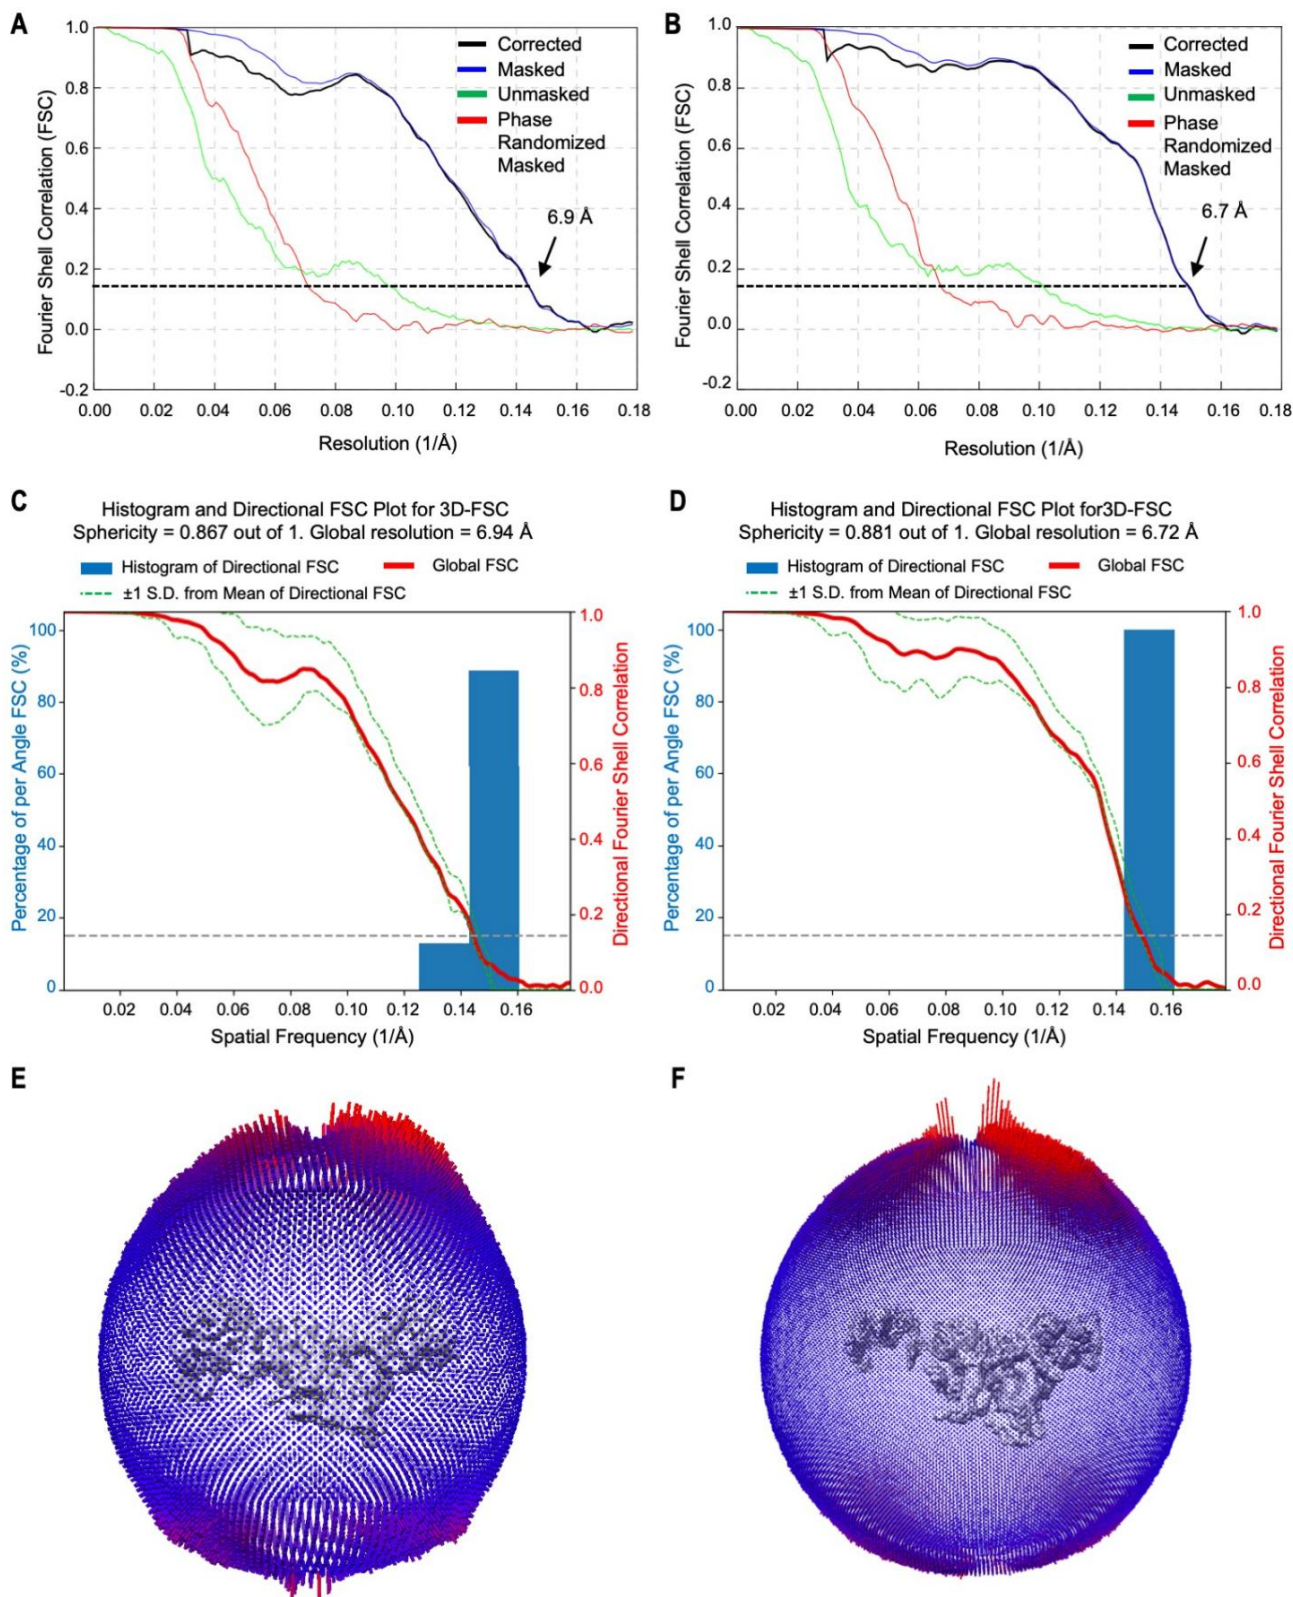

**Fig. S3. The quality of cryo-EM maps for the cytoplasmic ring (CR). (A-B)** Fourier shell correlation plots for the CR protomer (A) and the core region (B). **(C-D)** Directional FSC plots for the CR protomer (C) and the core region (D). **(E-F)** Angular distribution of the particles used for the final reconstruction of the CR protomer (E) and the core region (F).

AlphaFold logical flow

- Predict structures of individual Nups, look at the agreement among models, and pick the top ranked, or consensus models.
- For helical Nups, fit to density by prominent helical features.
- For  $\beta$ -propeller Nups, predict complex structures with contacting helical Nups, and confirm density positioning.
- For ambiguous Nup interactions, predict binary complex structures, and confirm density positioning.

**Fig. S4. AlphaFold flow chart.**

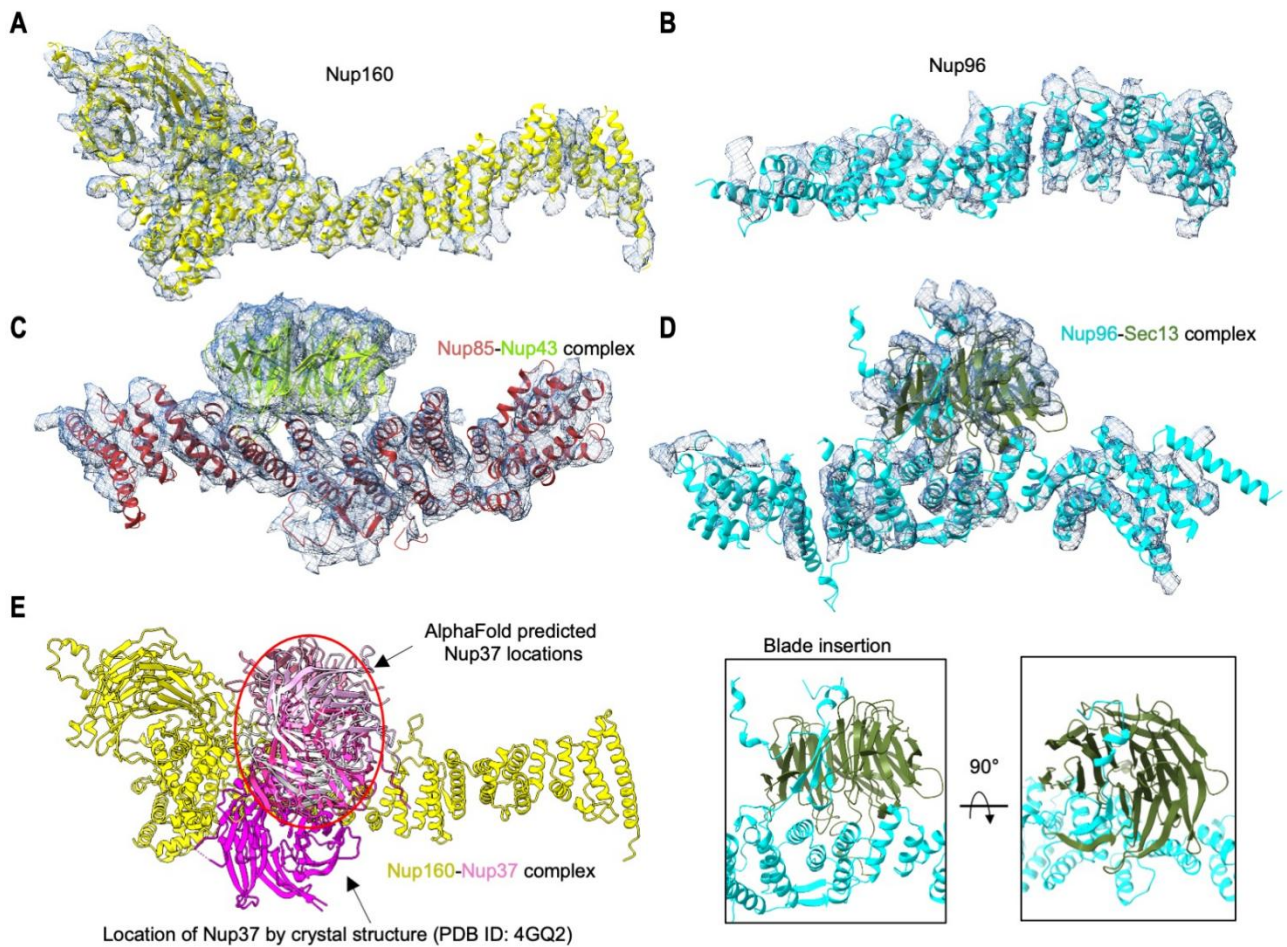

**Fig. S5. Cryo-EM map fitting of predicted structures of Nups in the Y-complex.** (A-C) Predicted Nup160 (A), Nup96 (B) and the Nup85-Nup43 complex (C) structures fitted in the map (contour level:  $4.5 \sigma$ ), showing alignment of the  $\alpha$ -helical features. (D) Predicted Nup96-Sec13 complex structures fitted in the map (top, contour level:  $4.5 \sigma$ ) and details at the location of blade insertion of the  $\beta$ -propeller domain (bottom). (E) AlphaFold failed to predict the Nup37-Nup160 complex structure.

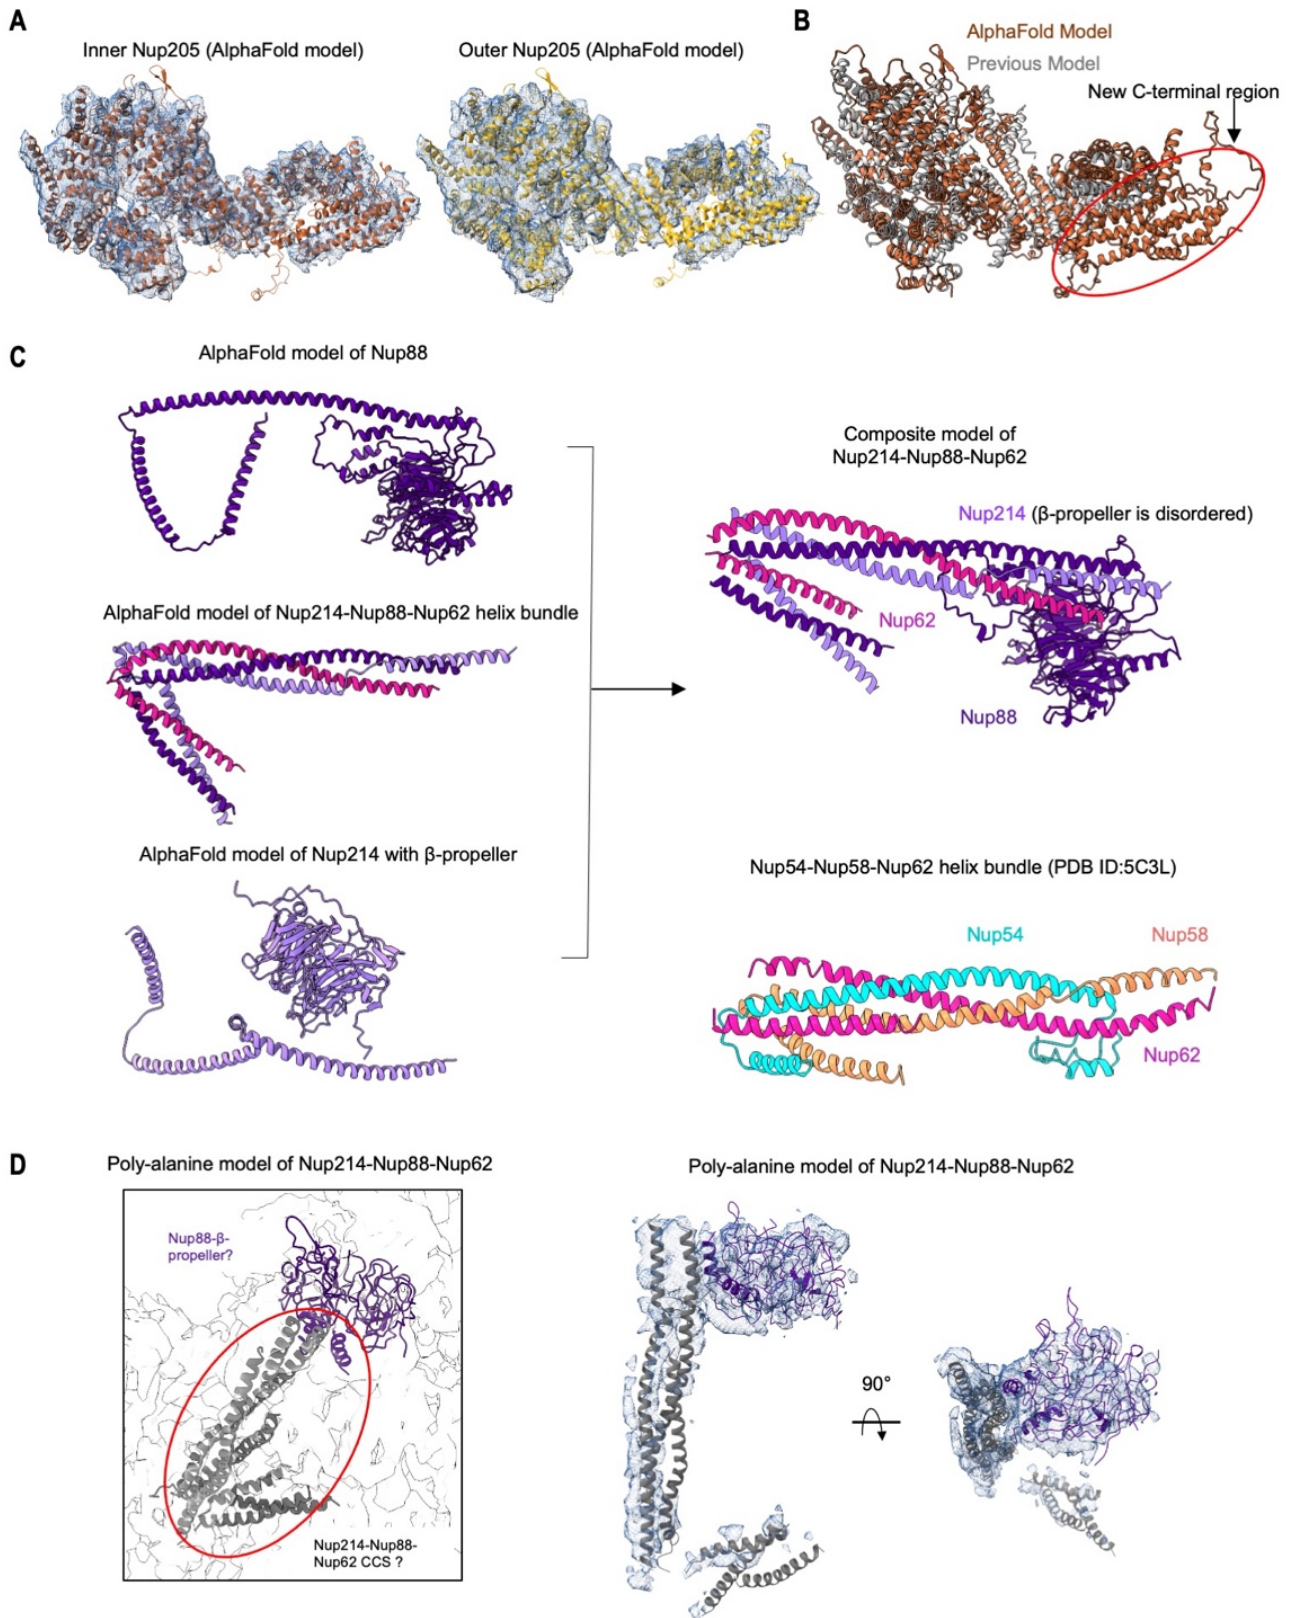

**Fig. S6. Fitting of Nup205 and the Nup214-Nup88-Nup62 complex.** (A) AlphaFold-generated model of Nup205 fitted into cryo-EM densities (contour level:  $4.5 \sigma$ ) near inner and outer Y-complexes. (B) Superimposed Nup205 models from AlphaFold (orange) and from homology model (gray, PDB ID: 6KL8). AlphaFold model shows a



previously missing C-terminal region. **(C)** Generation of the Nup214-Nup88-Nup62 composite model by combining multiple AlphaFold Predictions; each Nup was first predicted independently followed by prediction of the hetero-trimeric coiled coil bundles. Fitting of the composite model (top right) to the cryo-EM density is shown in Figure 3C. The homologous *X. laevis* Nup54-Nup58-Nup62 helix bundle structure (lower right) is shown for comparison. **(D)** Previously published poly-alanine model from PDB ID: 6KL8 fitted into the Nup214-Nup88-Nup62 density (contour level:  $4.5 \sigma$ ). The shorter trimeric coiled coil is out of our density.

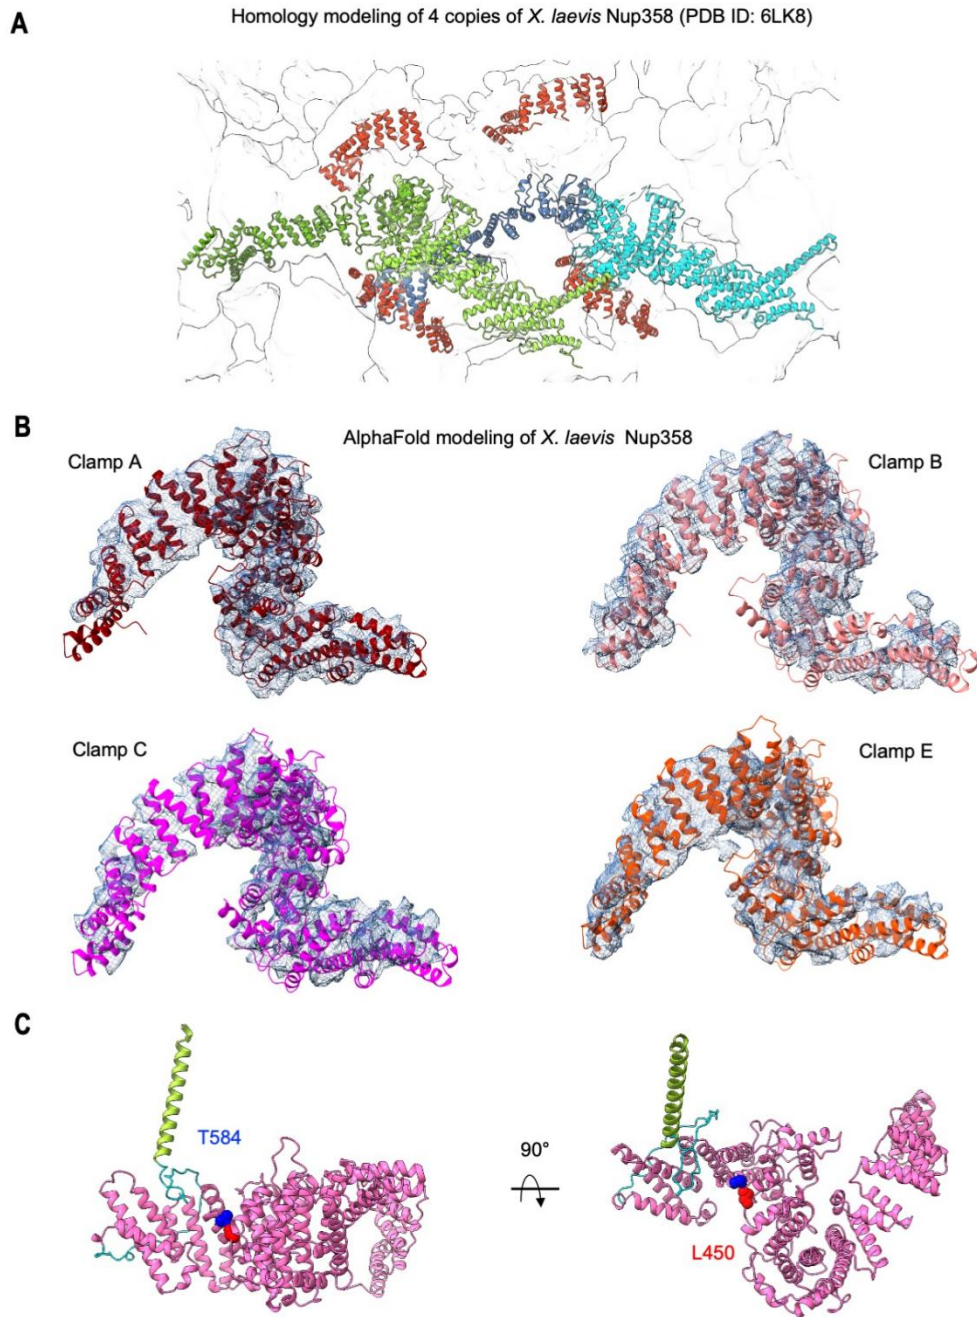

**Fig. S7. Nup358 model and fitting.** (A) *X. laevis* Nup358 generated by homology modeling from 4GA0 (PDB ID: 6KL8). (B) Nup385 model generated by AlphaFold fitted into the cryo-EM density map (contour level:  $8.0 \sigma$ ; density for clamp D is shown in Figure 4C). (C) Partially buried residue T584 (blue, Human T585) associated with autosomal dominant acute necrotizing encephalopathy (ADANE) interacts with L450 (red), and the T584M mutation may affect the structure.

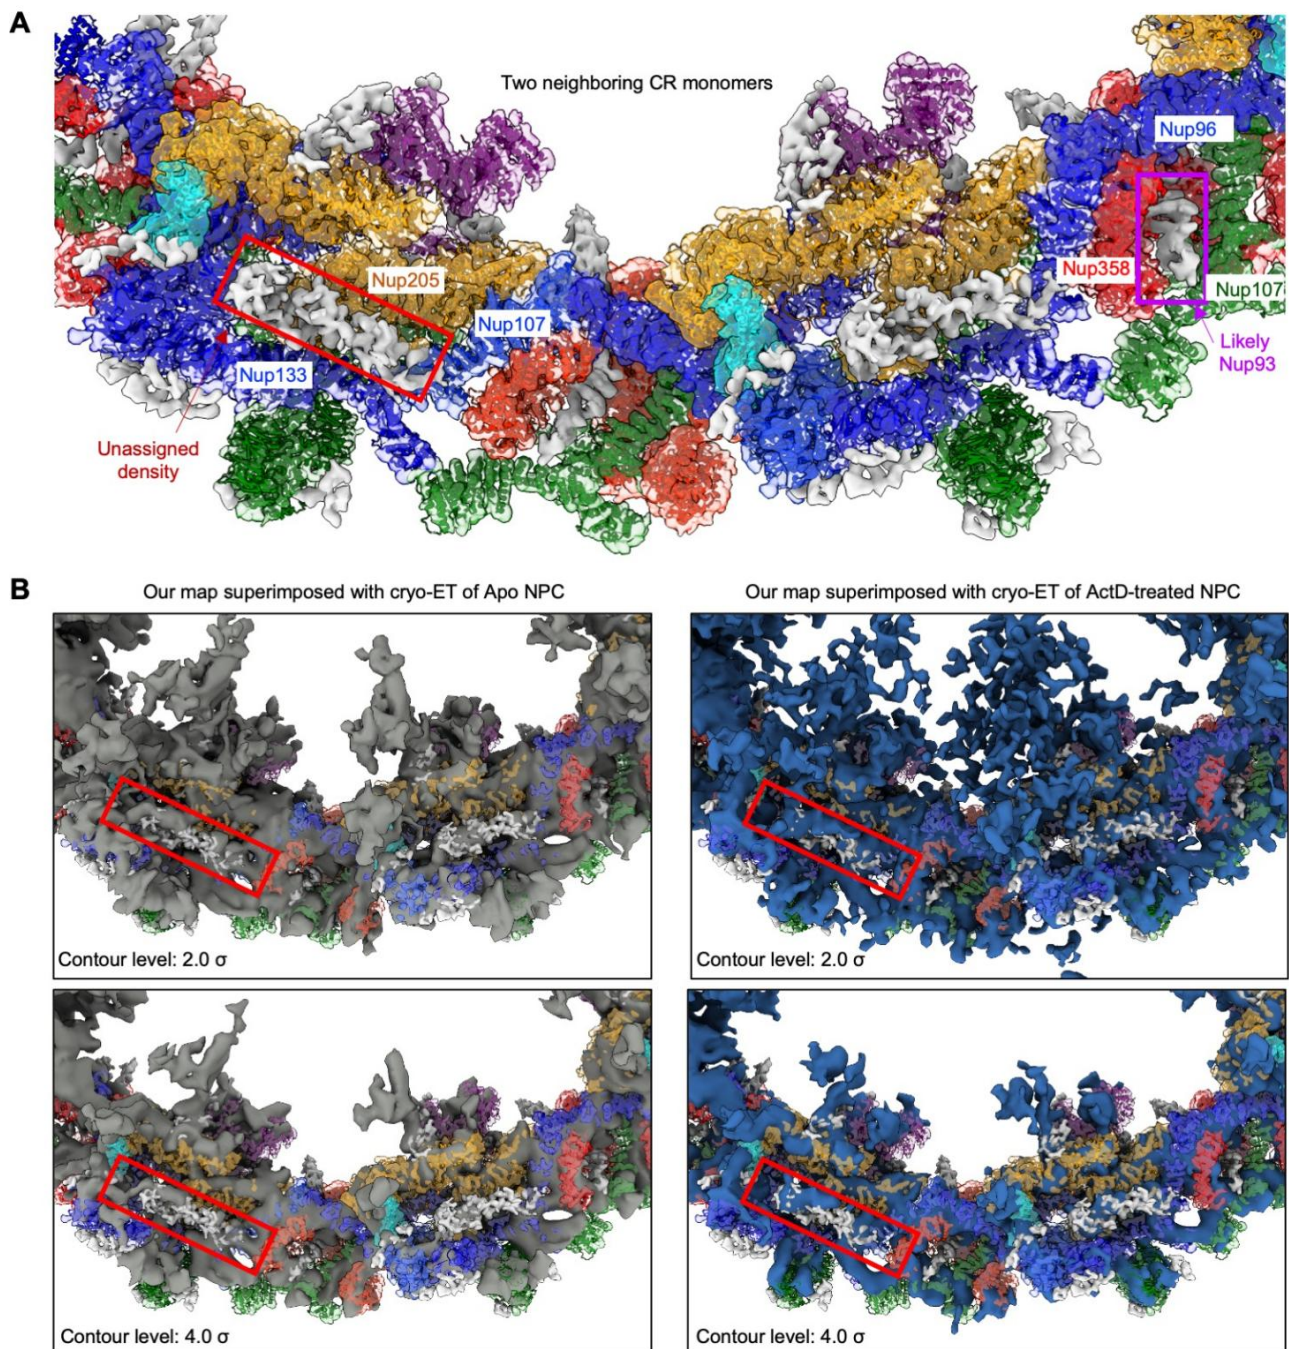

**Fig. S8. Unassigned densities in the *X. laevis* NPC CR map.** (A) Cryo-EM density map (contour level: 4.5  $\sigma$ ) of two neighboring CR protomers with all the assigned densities colored individually; Two dominant unassigned pieces of density are shown in light gray, and boxed in red and magenta respectively. One of them (boxed in magenta) should correspond to Nup93 but we cannot reliably fit our Nup93 model into the density. (B) Cryo-EM density map superimposed with *X. laevis* NPC cryo-ET map (EMDB:3005 and EMDB:3009) at lower and higher contour levels showing the existence of the red-boxed density. Left panel: Apo map (EMDB:3005) colored in dark gray; Right panel, ActD-treated map (EMDB:3009), colored in dark blue.

**Table S1. Data Collection, data processing and validation statistics**

NPC CR protomer (EMD-25817) and composite full ring (EMD-25818) at 6.9 Å resolution

**Data Collection and Processing (for each dataset)**

|                                                           |               |
|-----------------------------------------------------------|---------------|
| Microscope                                                | Titan Krios   |
| Voltage (keV)                                             | 300           |
| Camera                                                    | K3            |
| Magnification                                             | 64,000        |
| Pixel size at detector (Å/pixel)                          | 1.4           |
| Total electron exposure (e <sup>-</sup> /Å <sup>2</sup> ) | 80 to 140     |
| Exposure rate (e <sup>-</sup> /pixel/sec)                 | 1 to 1.4      |
| Number of frames collected during exposure                | 80 to 140     |
| Defocus range (µm)                                        | -1 to -3      |
| Automation software (EPU, SerialEM or manual)             | SerialEM      |
| Tilt angle (if grid was tilted, in degrees)               | 0, 35, 42, 45 |
| Energy filter slit width (if used, in eV)                 | 20            |
| Micrographs collected (no.)                               | 45,278        |
| Micrographs used (no.)                                    | 30,987        |
| Total extracted particles (no.)                           | 204,551       |

**Each Reconstruction after Symmetry Expansion**

|                                                          |                   |
|----------------------------------------------------------|-------------------|
| Refined particles (no.) / Final particles (no.)          | 333,214 / 333,214 |
| Point-group or helical symmetry parameters               |                   |
| Estimated error of translations/rotations (if available) |                   |
| Resolution (global, Å)                                   | 6.9               |
| FSC 0.5 (unmasked / masked)                              | 25 / 9.1          |
| FSC 0.143 (unmasked / masked)                            | 10.2 / 6.9        |
| Resolution range (local, Å)                              | 5.5 to 10         |
| Resolution range due to anisotropy (Å)                   | 6.0 to 9.1        |
| Map sharpening <i>B</i> factor range (Å <sup>2</sup> )   | -503 to -710      |
| Map sharpening methods                                   | LocalDeblur       |

**Model composition (for each model)**

|                  |        |
|------------------|--------|
| Protein residues | 21,112 |
|------------------|--------|

**Validation (for each model)**

|                                     |                    |
|-------------------------------------|--------------------|
| Model-Map scores                    |                    |
| CC (Chimera, Phenix)                | 0.69, 0.63         |
| Average FSC (0 / 0.143 / 0.5)       | (7.6 / 9.7 / 27.1) |
| R.m.s. deviations from ideal values |                    |
| Bond lengths (Å)                    | 0.012              |
| Bond angles (°)                     | 1.778              |
| MolProbity score                    | 2.13               |
| CaBLAM outliers                     | 1.18               |
| Clashscore                          | 20.05              |
| Poor rotamers (%)                   | 0.88               |
| C-beta outliers (%)                 | 0.23               |
| Ramachandran plot                   |                    |
| Favored (%)                         | 95.2               |
| Outliers (%)                        | 1.32               |

**Table S2. Statistics on AlphaFold-predicted  $\beta$ -propeller-containing single Nups.**

For each Nup, pLDDT (predicted local distance difference test), pTM (predicted template modeling), RMSD (root-mean-square deviation) range for pairwise superposition between rank 2-5 models and rank 1 model, fitting CC (correlation coefficient) of rank 1 model into the cryo-EM density, predicted alignment error (PAE) matrix, and ribbon diagram colored by per-residue pLDDT are shown. Residues predicted with high pLDDT or high confidence are in blue.

|                          |                                                                                                                               | PAE                                                                                  | Per-residue pLDDT  |
|--------------------------|-------------------------------------------------------------------------------------------------------------------------------|--------------------------------------------------------------------------------------|-------------------------------------------------------------------------------------------------------|
| Seh1                     | pLDDT: 92.1, pTM 0.90<br>RMSD: 0.14 to 0.22<br>ChimerX Fitting CC: 0.85<br>Phenix Fitting CC: 0.8                             |    |                    |
| Sec13                    | pLDDT: 88.8, pTM 0.87<br>RMSD: 0.12 to 0.16<br>ChimerX Fitting CC: 0.88<br>Phenix Fitting CC: 0.8                             |    |                    |
| Nup37                    | pLDDT: 92.0, pTM 0.89<br>RMSD: 0.15 to 0.22<br>ChimerX Fitting CC: 0.89<br>Phenix Fitting CC: 0.63                            |    |                    |
| Nup43                    | pLDDT: 86.5, pTM 0.86<br>RMSD: 0.12 to 0.17<br>ChimerX Fitting CC: 0.86<br>Phenix Fitting CC: 0.82                            |  |                  |
| Nup88                    | pLDDT: 80.1, pTM 0.74<br>RMSD: 0.48 to 1.6<br>ChimerX Fitting CC: 0.88<br>Phenix Fitting CC: 0.65                             |  |                  |
| Nup133                   | pLDDT: 79.8, pTM 0.53<br>RMSD: $\beta$ 0.17 to 0.12, $\alpha$ 0.7 to 1<br>ChimerX Fitting CC: 0.82<br>Phenix Fitting CC: 0.57 |  |                  |
| Nup155<br>(aa 1031-1388) | pLDDT: 93, pTM 0.86<br>RMSD: 0.33 to 0.45<br>ChimerX Fitting CC: 0.79<br>Phenix Fitting CC: 0.66                              |  |                  |
| Nup160                   | pLDDT: 78.6, pTM 0.67<br>RMSD: 0.93 to 1.8<br>ChimerX Fitting CC: 0.85<br>Phenix Fitting CC: 0.5                              |  |                  |
| Nup214<br>(aa 697-853)   | pLDDT: 0.93 pTM 0.43<br>RMSD: 1.26 to 3.4<br>ChimerX Fitting CC: 0.86<br>Phenix Fitting CC: 0.55                              |  |                  |

**Table S3. Statistics on AlphaFold-predicted all helical single Nups.** For each Nup, pLDDT (predicted local distance difference test), pTM (predicted template modeling), RMSD (root-mean-square deviation) range for pairwise superposition between rank 2-5 models and rank 1 model, fitting CC (correlation coefficient) of rank 1 model into the cryo-EM density, predicted alignment error (PAE) matrix, and ribbon diagram colored by per-residue pLDDT are shown. Residues predicted with high pLDDT or high confidence are in blue.

|                        |                                                                                                    | PAE                                                                                  | Per-residue pLDDT  |
|------------------------|----------------------------------------------------------------------------------------------------|--------------------------------------------------------------------------------------|-------------------------------------------------------------------------------------------------------|
| Nup62<br>(aa 350-490)  | pLDDT: 91.4, pMT 0.47<br>RMSD: 0.75 to 1.1<br>ChimerX Fitting CC: 0.79<br>Phenix Fitting CC: 0.46  |    |                    |
| Nup85                  | pLDDT: 86.3, pTM 0.78<br>RMSD: 0.42 to 0.49<br>ChimerX Fitting CC: 0.75<br>Phenix Fitting CC: 0.7  |    |                    |
| Nup96<br>(aa 250-923)  | pLDDT: 68.4, pTM 0.7<br>RMSD: 0.5 to 1.13<br>ChimerX Fitting CC: 0.84<br>Phenix Fitting CC: 0.69   |    |                    |
| Nup107<br>(aa 117-905) | pLDDT: 86.4, pTM 0.79<br>RMSD: 0.4 to 0.58<br>ChimerX Fitting CC: 0.81<br>Phenix Fitting CC: 0.62  |  |                  |
| Nup205                 | pLDDT: 78.3, pTM 0.74<br>RMSD: 1.04 to 1.77<br>ChimerX Fitting CC: 0.88<br>Phenix Fitting CC: 0.69 |  |                  |
| Nup358<br>(aa 1-800)   | pLDDT: 86.2, pTM 0.81<br>RMSD: 0.26 to 0.41<br>ChimerX Fitting CC: 0.8<br>Phenix Fitting CC: 0.68  |  |                  |

**Table S4. Statistics on AlphaFold-predicted Nup complexes.** For each complex, pLDDT (predicted local distance difference test), pTM (predicted template modeling), RMSD (root-mean-square deviation) range for pairwise superposition between rank 2-5 models and rank 1 model, fitting CC (correlation coefficient) of rank 1 model into the cryo-EM density, predicted alignment error (PAE) matrix, and ribbon diagram colored by per-residue pLDDT are shown. Residues predicted with high pLDDT or high confidence are in blue.

|                                                              |                                                                                      | PAE                                                                                 | Per-residue pLDDT  |
|--------------------------------------------------------------|--------------------------------------------------------------------------------------|-------------------------------------------------------------------------------------|-------------------------------------------------------------------------------------------------------|
| Nup85(A)-Seh1(B)                                             | pLDDT: 87.18, pTM 0.82<br>RMSD: 0.46 to 0.63<br>Fitting CC: 0.83                     |    |                    |
| Nup85(B)-Nup43(A)                                            | pLDDT: 85.1, pTM 0.82<br>RMSD: 0.4 to 0.68<br>Fitting CC: 0.84                       |    |                    |
| Nup96(aa 250-923)(A)-<br>Sec13(B)                            | pLDDT: 83.52, pTM 0.83<br>RMSD: 0.38 to 0.58<br>Fitting CC: 0.82                     |   |                   |
| Nup160(A)-Nup133(B)                                          | pLDDT: 80.15, pTM 0.76<br>RMSD: Rank 1-5 1.1,<br>Rank 2-3-4 0.74<br>Fitting CC: 0.85 |  |                  |
| Nup214(A)-Nup88(B)-<br>Nup62(C) hetero-<br>trimeric (Rank 3) | pLDDT: 87.5, pTM 0.6<br>RMSD: 0.88 to 1.4<br>Fitting CC: 0.84                        |  |                  |

**Table S5. AlphaFold-predicted model and their PDB homologs.** For each *Xenopus laevis* Nup, its total amino acid length, the number of residues built by AlphaFold, close homologs in the PDB and their species, amino acid length of the PDB structures, RMSD (root-mean-square deviation) of the PDB structure against the AlphaFold model, and % identity of homologous PDB structures against the *Xenopus Laevis* sequence. Xi: *Xenopus laevis*; Sc: *Saccharomyces cerevisiae*; Sp: *Schizosaccharomyces pombe*; Hs: *Homo sapiens*; Rt: *Rattus norvegicus*; Ct: *Chaetomium thermophilum*; Pg: *Pan troglodytes*. Nups highlighted in red have only partial PDB structures of their homologs. NA: sequence homology below detection.

| <b>X. laevis Nup</b> | <b>Total length (aa)</b> | <b>Ordered and built by AlphaFold (aa)</b> | <b>Homolog in PDB</b> | <b>PDB length (aa)</b> | <b>RMSD</b> | <b>Identity (%)</b> |
|----------------------|--------------------------|--------------------------------------------|-----------------------|------------------------|-------------|---------------------|
| <b>Seh1</b>          | 360                      | 322                                        | 4XMM Sc               | 349                    | 0.946       | 34.38               |
|                      |                          |                                            | 3F3F Sc               | 351                    | 0.896       | 34.38               |
| <b>Sec13</b>         | 360                      | 306                                        | 4XMM Sc               | 297                    | 0.87        | 49.83               |
|                      |                          |                                            | 3IKO Sc               | 297                    | 0.899       | 49.83               |
|                      |                          |                                            | 3BG1 Sc               | 316                    | 0.663       | 88.61               |
| <b>Nup37</b>         | 326                      | 326                                        | 4GQ2 Sp               | 393                    | 3.547       | 27.56               |
| <b>Nup43</b>         | 375                      | 375                                        | 4I79 Hs               | 380                    | 0.427       | 67.81               |
| <b>Nup62</b>         | 547                      | A 130, B 28                                | 5H1X Rn               | 52                     | 2.98        | 86.54               |
|                      |                          |                                            | 5C3L XI               | 150                    | 1.287       | 100.00              |
| <b>Nup85</b>         | 653                      | 653                                        | 4XMM Sc               | 701                    | 6.676       | 22.28               |
|                      |                          |                                            | 3F3F Sc               | 570                    | 9.476       | 22.28               |
| <b>Nup96</b>         | 923                      | 638                                        | 4XMM Sc               | 647                    | 6.015       | 21.12               |
|                      |                          |                                            | 3IKO Sc               | 427                    | 3.824       | 21.12               |
|                      |                          |                                            | 3BG1 Sc               | 431                    | 4.071       | 21.12               |
| <b>Nup107</b>        | 916                      | 789                                        | 4XMM Sc               | 451                    | 3.916       | 24.32               |
|                      |                          |                                            | 3IKO Sc               | 460                    | 3.894       | 23.73               |
|                      |                          |                                            | 3I4R Hs               | 277                    | 0.666       | 83.96               |
| <b>Nup133</b>        | 1140                     | Inner 1064, Outer 670                      | 3I4R Hs               | 644                    | 6.726       | 71.03               |
|                      |                          |                                            | 1XKS Hs               | 450                    | 0.712       | 56.81               |
| <b>Nup155</b>        | 1388                     | 357                                        | 5HB1 Ct               | 830                    | 6.859       | 25.3                |
|                      |                          |                                            | 5HAZ Ct               | 567                    | 5.155       | 28.57               |
| <b>Nup160</b>        | 1435                     | 1350                                       | 4XMM Sc               | 1036                   | 15.798      | NA                  |
|                      |                          |                                            | 4GQ2 Sp               | 950                    | 14.83       | NA                  |
| <b>Nup205</b>        | 2011                     | 2011                                       | 5HB4 Ct               | 1596                   | 6.525       | 23.66               |
| <b>Nup358</b>        | 2905                     | 798                                        | 4GA0 Hs               | 150                    | 0.84        | 68.75               |
|                      |                          |                                            | 4GA2 Pg               | 150                    | 0.7         | 68.06               |



**Table S6. AlphaFold-predicted model aligned with their PDB homologs.** Each *Xenopus leavis* Nup predicted by AlphaFold (cyan) were aligned with available PDB homologs (magenta). RMSD and identity for all the alignment are reported in Table S5.

|                                                                                     |                                                                                     |                                                                                     |                                                                                      |                                                                                       |
|-------------------------------------------------------------------------------------|-------------------------------------------------------------------------------------|-------------------------------------------------------------------------------------|--------------------------------------------------------------------------------------|---------------------------------------------------------------------------------------|
|    |    |    |    |    |
| Seh1 - 4XMM                                                                         | Seh1 - 3F3F                                                                         | Sec13 - 4XMM                                                                        | Sec13 - 3IKO                                                                         | Sec13 - 3BG1                                                                          |
|    |    |    |    |    |
| Nup37 - 4GQ2                                                                        | Nup43 - 4I79                                                                        | Nup62 - 5H1X                                                                        | Nup62 - 5C3L                                                                         | Nup85 - 4XMM                                                                          |
|   |  |   |   |  |
| Nup85 - 3F3F                                                                        | Nup96 - 4XMM                                                                        | Nup96 - 3IKO                                                                        | Nup96 - 3BGI                                                                         | Nup107 - 4XMM                                                                         |
|  |  |  |  |  |
| Nup107 - 3IKO                                                                       | Nup107 - 3I4R                                                                       | Nup133 - 3I4R                                                                       | Nup133 - 1XKS                                                                        | Nup155 - 5HB1                                                                         |
|  |  |  |  |  |
| Nup155 - 5HAZ                                                                       | Nup160 - 4XMM                                                                       | Nup160 - 4GQ2                                                                       | Nup205 - 5HB4                                                                        | Nup358 - 4GA0                                                                         |
|  |                                                                                     |                                                                                     |                                                                                      |                                                                                       |
| Nup358 - 4GA2                                                                       |                                                                                     |                                                                                     |                                                                                      |                                                                                       |
